# Supplementary material for: Use of Oral Contraceptives as a Potential Risk Factor for Breast Cancer: A Systematic Review and Meta-Analysis of Case-Control Studies Up to 2010
Source: MDPI journal article supplement (doi:10.3390/ijerph18094638), 2021-04-27
Supplement: s1 [file s1]

Additional file 1. Quality assessment of included studies based on the Newcastle-Ottawa Scale score

| <b>Study ID</b>         | <b>Is the case definition adequate</b> | <b>Representativeness of the cases</b> | <b>Selection of the controls</b> | <b>Definition of controls</b> | <b>Comparability of cases and controls on the basis of the design or analysis</b> | <b>Ascertainment of exposure</b> | <b>Same method of ascertainment for cases and controls</b> | <b>Non-response rate</b> | <b>Total stars</b> |
|-------------------------|----------------------------------------|----------------------------------------|----------------------------------|-------------------------------|-----------------------------------------------------------------------------------|----------------------------------|------------------------------------------------------------|--------------------------|--------------------|
| <i>Adebamowo 1999</i>   | *                                      |                                        | *                                | *                             |                                                                                   | *                                | *                                                          |                          | 5                  |
| <i>Althuis 2003</i>     | *                                      | *                                      |                                  | *                             | *                                                                                 | *                                |                                                            |                          | 5                  |
| <i>Beji 2007</i>        | *                                      | *                                      | *                                | *                             | *                                                                                 | *                                | *                                                          |                          | 7                  |
| <i>Bustan 1993</i>      | *                                      | *                                      |                                  | *                             | *                                                                                 |                                  |                                                            | *                        | 5                  |
| <i>Clavel 1991</i>      | *                                      | *                                      |                                  | *                             |                                                                                   |                                  | *                                                          | *                        | 5                  |
| <i>Chie 1998</i>        | *                                      | *                                      | *                                |                               | *                                                                                 | *                                |                                                            |                          | 5                  |
| <i>Croghan 2009</i>     | *                                      |                                        | *                                | *                             |                                                                                   | *                                | *                                                          | *                        | 6                  |
| <i>Dinger 2006</i>      | *                                      | *                                      |                                  | *                             |                                                                                   | *                                | *                                                          |                          | 5                  |
| <i>Ebrahimi 2002</i>    | *                                      |                                        | *                                | *                             | *                                                                                 |                                  | *                                                          |                          | 5                  |
| <i>Ellery 1986</i>      | *                                      | *                                      | *                                | *                             |                                                                                   | *                                |                                                            |                          | 5                  |
| <i>Ewertz 1992</i>      | *                                      | *                                      |                                  | *                             | *                                                                                 | *                                |                                                            |                          | 5                  |
| <i>Faheem 2007</i>      | *                                      | *                                      | *                                |                               | *                                                                                 |                                  | *                                                          | *                        | 6                  |
| <i>Gomes 1995</i>       | *                                      | *                                      |                                  | *                             | *                                                                                 | *                                |                                                            |                          | 5                  |
| <i>Hadjisavvas 2010</i> | *                                      | *                                      | *                                |                               |                                                                                   | *                                | *                                                          | *                        | 6                  |
| <i>Hall 2005</i>        | *                                      |                                        | *                                | *                             | *                                                                                 | *                                |                                                            |                          | 5                  |
| <i>Harris 1982</i>      |                                        | *                                      |                                  | *                             | *                                                                                 | *                                |                                                            | *                        | 5                  |
| <i>Harris 1990</i>      |                                        | *                                      |                                  | *                             | *                                                                                 | *                                | *                                                          |                          | 5                  |
| <i>Hennekens 1984</i>   |                                        | *                                      | *                                | *                             |                                                                                   |                                  | *                                                          | *                        | 5                  |
| <i>Janerich 1983</i>    | *                                      | *                                      | *                                |                               | *                                                                                 | *                                |                                                            |                          | 5                  |
| <i>Jick 1989</i>        | *                                      |                                        | *                                | *                             |                                                                                   | *                                | *                                                          |                          | 5                  |
| <i>Kamarudin 2006</i>   | *                                      | *                                      |                                  | *                             | *                                                                                 | *                                | *                                                          |                          | 6                  |
| <i>Kishk 1999</i>       | *                                      | *                                      |                                  | *                             | *                                                                                 | *                                |                                                            |                          | 5                  |
| <i>Kuru 2002</i>        | *                                      | *                                      | *                                |                               |                                                                                   | *                                |                                                            | *                        | 5                  |

|                           |   |   |   |   |   |   |   |   |   |
|---------------------------|---|---|---|---|---|---|---|---|---|
| <i>La Vecchia 2006</i>    | * | * | * |   | * |   | * | * | 6 |
| <i>Lawlor 2004</i>        |   | * |   | * | * | * | * |   | 5 |
| <i>Lee 1987</i>           | * | * | * |   | * | * |   |   | 5 |
| <i>Lee 1992</i>           | * | * | * |   | * | * |   |   | 5 |
| <i>Lees 1978</i>          | * | * |   | * | * |   |   | * | 5 |
| <i>Levi 1996</i>          | * | * | * |   | * | * |   | * | 6 |
| <i>Lipworth 1995</i>      | * | * |   | * | * |   | * | * | 6 |
| <i>Lubin 1982</i>         | * | * |   | * |   |   | * | * | 5 |
| <i>Lund 1989</i>          | * | * | * |   | * | * |   |   | 5 |
| <i>Magnusson 1999</i>     | * | * |   | * |   | * | * |   | 5 |
| <i>Mahouri 2007</i>       | * | * | * |   | * |   | * | * | 6 |
| <i>Marchbanks 2002</i>    | * | * |   | * | * |   | * |   | 5 |
| <i>McCredie 1998</i>      |   | * | * | * | * |   | * |   | 5 |
| <i>McPherson 1987</i>     | * |   | * | * | * |   |   | * | 5 |
| <i>Newcomb 1996</i>       | * | * | * |   |   | * | * |   | 5 |
| <i>Norsa'adah 2005</i>    | * | * |   | * | * | * |   |   | 5 |
| <i>Olsson 1989</i>        | * | * |   | * |   | * | * |   | 5 |
| <i>Ozmen 2009</i>         | * | * | * | * | * |   | * | * | 7 |
| <i>Paffenbarger 1980</i>  |   | * | * |   | * | * | * |   | 5 |
| <i>Palmer 1995</i>        | * | * |   | * | * | * |   |   | 5 |
| <i>Paul 1995</i>          | * | * | * |   | * | * | * |   | 6 |
| <i>Pike 1981</i>          | * |   | * | * |   | * | * |   | 5 |
| <i>Price 1999</i>         | * | * | * |   | * |   |   | * | 5 |
| <i>Primic-Žakelj 1995</i> | * | * | * |   | * |   | * | * | 6 |
| <i>Ravnihar 1988</i>      |   |   | * | * | * |   | * | * | 5 |
| <i>Ravnihar 1979</i>      | * | * | * |   | * | * |   |   | 5 |
| <i>Rohan 1988</i>         | * | * |   | * | * | * |   |   | 5 |
| <i>Rookus 1994</i>        | * | * | * |   | * | * |   | * | 6 |
| <i>Rosenberg 1992</i>     | * | * |   | * | * |   | * |   | 5 |
| <i>Rosenberg 1996</i>     | * | * | * | * | * |   | * | * | 7 |

|                         |   |   |   |   |   |   |   |   |   |
|-------------------------|---|---|---|---|---|---|---|---|---|
| <i>Rosenberg 2009</i>   | * | * | * | * | * |   | * | * | 7 |
| <i>Rossing 1996</i>     | * |   | * | * | * |   | * | * | 6 |
| <i>Sartwell 1977</i>    |   | * |   | * | * | * |   | * | 5 |
| <i>Schildkraut 1991</i> | * | * | * |   | * | * |   |   | 5 |
| <i>Shantakumar 2007</i> | * | * | * |   | * |   | * | * | 6 |
| <i>Shapiro 2000</i>     | * | * | * |   | * | * | * | * | 7 |
| <i>Stanford 1989</i>    | * | * |   | * |   | * |   | * | 5 |
| <i>Sweeney 2007</i>     | * | * | * |   | * | * | * | * | 7 |
| <i>Talamini 1985</i>    |   | * | * |   | * |   | * | * | 5 |
| <i>Tavani 1993</i>      | * | * | * |   | * | * |   |   | 5 |
| <i>Tessaro 2001</i>     | * | * | * | * | * |   |   | * | 6 |
| <i>Traina 1996</i>      |   | * | * |   | * | * | * |   | 5 |
| <i>UK NCCS 1989</i>     | * | * | * | * |   | * | * |   | 6 |
| <i>Ursin 1998</i>       | * | * | * |   | * |   | * | * | 6 |
| <i>Ursin 1999</i>       | * | * | * |   | * |   | * | * | 6 |
| <i>Vessey 1983</i>      |   | * | * | * |   | * |   | * | 5 |
| <i>Viladiu 1996</i>     | * | * | * |   | * |   | * | * | 6 |
| <i>Wang 1992</i>        | * | * |   |   | * |   | * | * | 5 |
| <i>Weinstein 1991</i>   | * |   | * |   | * |   | * | * | 5 |
| <i>White 1994</i>       | * | * | * |   | * |   | * | * | 6 |
| <i>WHO study 1990</i>   | * | * | * | * |   | * | * | * | 7 |
| <i>Wingo 1991</i>       | * | * | * |   | * | * |   |   | 5 |
| <i>Wynder 1978</i>      |   | * |   | * | * |   | * | * | 5 |
| <i>Yang 1997</i>        | * | * |   | * |   | * | * |   | 5 |
| <i>Yavari 2005</i>      | * | * | * |   | * |   | * | * | 6 |
| <i>Yuan 1988</i>        | * | * |   | * |   | * | * |   | 5 |
